# Supplementary material for: The capital intensity of photovoltaics manufacturing: barrier to scale and opportunity for innovation
Source: Royal Society of Chemistry journal article supplement (doi:10.1039/c5ee01509j), 2015-01-01
Supplement: c5ee01509j1.xlsx [file c5ee01509j1.xlsx]

## Sheet: Sheet1
Estimate for Standard mono Si with U.S. Manufacturing
Doug Powell
MIT Photovoltaic Research Laboratory
	Top-Level Inputs
	Item	Value	Unit
	Module Efficiency	16	[%]
	Cell Thickness	180	[um]
	Ingot Recycled before brick stage	0.338	[%]
	Ingot Not-Recycled before brick stage	0.015	[%]
	Wire Sawing Cut Width	130	[um]
	Virgin Silicon Price	23	[$/kg]
	Operator Wage	14.5	[$/hr]
	Technician Wage	20.61	[$/hr]
	Supervisor Wage	27.27	[$/hr]
	Employee Cost Multiplier	1.325	[-]
	Electricity Cost	0.0687	[$/kWh]
	Shipping Costs	0	[$/container]
	Uptime	96	[%]
	Nominal WACC	0.14	[%]
	Expected Price Inflation	0	[%]
	Expected Cost Inflation	0	[%]
	Effective Tax Rate	0.279	[%]
	SG&A	0.094	[% of Revenue]
	R&D	0.011	[% of Revenue]
	Net Working Capital Period	3	[months]
	Top-Level Outputs
	Variable Cost (w/o depreciation)	0.540557	[$/W]
	Variable Cost (w/o depreciation)	86.4892	[$/m2]
	Minimum Sustainable Price	0.851423	[$/W]		<- To update MSP, use built in Excel Solver. For help, see "Notes" tab
	Minimum Sustainable Price	136.228	[$/m2]
	Capex	0.676419	[$/WaCap]
	PP&E Ratio	0.794457	[-]
	Silicon Use	4.30804	[g/W]
	Gross Margin	36.5113	[%]
	Operating Margin (EBIT)	15.0713	[%]
	Cost Breakdown							Allotment [$/W]				Allotment Specific Adder [$/W]
	Item	Cost [$/cell]	Adder [$/W]	Multiplier	Cost [$/m2]	Cost [$/W]	Percentage	Ingot	Wafer	Cell	Module	Ingot	Wafer	Cell	Module
	Silicon Feedstock	0.433497		1	15.8536	0.0990848	0.183301	0.0990848
	Maintenance		NA	1	5.52094	0.0345059	0.0638339	0.00845494	0.00497174	0.0151659	0.0059133
	Labor		NA	1	16.7009	0.10438	0.193098	0.0387145	0.0221721	0.0223579	0.0211358
	Input Electricity		NA	1	7.07853	0.0442408	0.081843	0.00815614	0.0126713	0.0204641	0.00294924
	Metal Paste	0.139662		1	5.10762	0.0319226	0.0590551			0.0319226
	Crucible			1	0.398853	0.00249283	0.0046116	0.00249283
	Wire	0.0654134		1	2.39226	0.0149516	0.0276596		0.0149516
	Slurry	0.0564181		1	2.06329	0.0128955	0.023856		0.0128955
	Glass			1	5.65657	0.0353535	0.065402				0.0353535
	Frame			1	3.90187	0.0243867	0.045114				0.0243867
	Encapsulant			1	3.63636	0.0227273	0.0420442				0.0227273
	JB and Cable			1	4.61759	0.02886	0.0533893				0.02886
	Chemicals	0.1		1	3.65713	0.0228571	0.0422843			0.0228571
	Backsheet			1	4.79798	0.0299874	0.0554749				0.0299874
	Ribbon			1	3.78643	0.0236652	0.0437792				0.0236652
	Screens	0.036075		1	1.31931	0.0082457	0.0152541			0.0082457
	Shipping costs			1	0	0	0				0
	Sum of Variable Costs				86.4892	0.540557	1	0.156903	0.0676623	0.121013	0.194978
	Depreciation		NA	NA	14.9033	0.0931456		0.0232395	0.0133674	0.0412495	0.0152892
	SG&A				12.8054	0.0800338
	R&D				1.4985	0.00936565
	Sum of Fixed Costs				29.2072	0.182545
	Minimum Sustainable Price				136.228	0.851423
	Manufacturing Cost Calculations
	Module Power
	Number of Cells per Module	60	[cells/module]
	Area Utilization	89	[%]
	Area of module	1.64063	[m^2/module]
	Power Out Per Module	262.501	[W/module]
	Silicon Feedstock
	Silicon Density	2329	[kg/m^3]
	Wafer Area	237	[cm^2]
	Mass of Cell	9.93551	[g]
	Total Virgin Si Utilization	0.571935	[-]
	Mass of Virgin Si Consumed per Cell at 100% yield	0.0173717	[kg/cell]
	Dollars per Cell at 100% yield	0.39955	[$/cell]
	Yield from this step on	0.92169	[-]
	Dollars per Cell	0.433497	[$/cell]
	Total Crystallized Si Utilization	0.375677	[-]
	Total Mass of Silicon Crystallized per Cell at 100% Yield	0.0264469	[kg/cell]
	Capital Cost
	Reference Plant Output	400	[MW/yr]
	Reference Module Efficiency	13.6	[-]
	Maximum Module Output per hour	335.751	[m^2/hr]
	Module output per m^2	160	[W/m^2]
	Maximum Module Output per hour	53720.1	[W/hr]
	Adjusted Module Output per hour	47532.8	[W/hr]
	Adjusted Module Output per year	416.387	[MW/yr]
	Maximum Module Output per hour	470.588	[MW/yr]
	Ingot Equipment Depreciation Period	7	[yr]
	Wafer Equipment Depreciation Period	7	[yr]
	Cell Equipment Depreciation Period	7	[yr]
	Module Equipment Depreciation Period	7	[yr]
	Facility Depreciation Period	25	[yrs]
	Capex Multiplier	1	[-]
					Capex At 100% Yield and Uptime			Capex At Actual Yield and Uptime
	Ingot	Equipment Cost at 100% yield & uptime [$/kg/hr]	Facility Cost at 100% yield & uptime [$/kg/hr]	Equipment [$/WaCap]	Facility [$/WaCap]	Total [$/WaCap]	Equipment [$/(W/yr)]	Facility [$/(W/yr)]	Total [$/(W/yr)]	Straight-Line Depreciation Payment [$/W]
	Czochralski Growth	201383	25732.3	0.138968	0.017757	0.156725	0.157058	0.0200685	0.177126	0.0232395
	List additional as needed			0	0	0	0	0	0	0
				0	0	0	0	0	0	0
				0	0	0	0	0	0	0
				0	0	0	0	0	0	0
				0	0	0	0	0	0	0
				0	0	0	0	0	0	0
				0	0	0	0	0	0	0
				0	0	0	0	0	0	0
	Ingot Sum	201383	25732.3	0.138968	0.017757	0.156725	0.157058	0.0200685	0.177126	0.0232395
	Wafer	Equipment Cost at 100% yield & uptime [$/wafer/hr]	Facility Cost at 100% yield & uptime [$/wafer/hr]
	Brick Preparation	910.322	144.209	0.0237526	0.00376279	0.0275154	0.0268445	0.0042526	0.0310971	0.00400504
	Wire Sawing	740.81	233.218	0.0193296	0.00608526	0.0254149	0.0218458	0.00687738	0.0287232	0.00339592
	Slurry & Scrap Collection	1101.58	34.7867	0.028743	0.000907675	0.0296507	0.0324845	0.00102583	0.0335103	0.00468168
	Inspect and Sort, Package	246.429	209.091	0.00642997	0.00545573	0.0118857	0.00726696	0.0061659	0.0134329	0.00128477
	List additional as needed			0	0	0	0	0	0	0
				0	0	0	0	0	0	0
				0	0	0	0	0	0	0
				0	0	0	0	0	0	0
				0	0	0	0	0	0	0
	Wafer Sum	2999.14	621.306	0.0782553	0.0162115	0.0944667	0.0884418	0.0183217	0.106763	0.0133674
	Cell	Equipment Cost at 100% yield & uptime [$/wafer/hr]	Facility Cost at 100% yield & uptime [$/wafer/hr]
	Wafer Testing	333.953	315.4	0.00871368	0.00822958	0.0169433	0.00935554	0.00883579	0.0181913	0.00168994
	Texture & Damage Etch	1205.25	125.922	0.0314481	0.00328562	0.0347337	0.0337646	0.00352764	0.0372922	0.00496462
	Emitter Diffusion	1894.07	175.739	0.0494212	0.00458547	0.0540066	0.0530616	0.00492324	0.0579849	0.00777716
	PSG Removal & Edge Isolate	1183.01	75.1116	0.0308677	0.00195985	0.0328276	0.0331415	0.00210422	0.0352457	0.00481867
	PECVD of SiNx:H	1224.49	114.796	0.0319502	0.00299533	0.0349455	0.0343037	0.00321597	0.0375196	0.00502916
	Screen Print	1971.73	179.248	0.0514475	0.00467705	0.0561246	0.0552372	0.00502157	0.0602588	0.00809189
	Co-fire	1176.95	121.754	0.0307097	0.00317686	0.0338865	0.0329718	0.00341087	0.0363827	0.00484669
	Inspect, Sort, Package	862.421	517.453	0.0225028	0.0135017	0.0360044	0.0241604	0.0144962	0.0386566	0.00403133
	List additional as needed			0	0	0	0	0	0	0
				0	0	0	0	0	0	0
				0	0	0	0	0	0	0
				0	0	0	0	0	0	0
				0	0	0	0	0	0	0
	Cell Sum	9851.88	1625.42	0.257061	0.0424114	0.299472	0.275996	0.0455355	0.321532	0.0412495
	Module	Equipment Cost at 100% yield & uptime [$/module/hr]	Facility Cost at 100% yield & uptime [$/module/hr]
	Cell Testing	42924.1	21462.1	0.0186667	0.00933333	0.028	0.0196409	0.00982043	0.0294613	0.00319865
	String, Tab, and Interconnect	40744.4	7545.25	0.0177187	0.00328125	0.021	0.0186435	0.00345249	0.022096	0.00280145
	Front Glass Load & Wash	16556.4	3895.63	0.0072	0.00169412	0.00889412	0.00757576	0.00178253	0.00935829	0.00115355
	Encapsulate & Laminate	47829.7	12299.1	0.0208	0.00534857	0.0261486	0.0218855	0.00562771	0.0275132	0.00335161
	Frame and Seal	23914.9	7033.78	0.0104	0.00305882	0.0134588	0.0109428	0.00321846	0.0141612	0.00169199
	J-Box and Potting	12325.4	2054.23	0.00536	0.000893333	0.00625333	0.00563973	0.000939955	0.00657969	0.000843274
	Test, Sort, Package	28105.1	22484.1	0.0122222	0.00977778	0.022	0.0128601	0.0102881	0.0231481	0.00224868
	List additional as needed			0	0	0	0	0	0	0
				0	0	0	0	0	0	0
	Module Sum	212400	76774.1	0.0923676	0.0333872	0.125755	0.0971882	0.0351296	0.132318	0.0152892
			Total Sum	0.566652	0.109767	0.676419	0.618684	0.119055	0.737739	0.0931456
	Maintenance
	Equipment percentage of initial investment	0.05	[-]
	Building percentage of initial investment	0.03	[-]
		Maintenance Cost [$/W]
	Ingot	0.00845494
	Wafer	0.00497174
	Cell	0.0151659
	Module	0.0059133
	Total [$/W]	0.0345059
	Labor
		Operator	Technician	Supervisor	Operator [person/shift/MWaCap]	Technician [person/shift/MWaCap]	Supervisor [person/shift/MWaCap]	Operator [person/shift/(MW/yr)]	Technician [person/shift/(MW/yr)]	Supervisor [person/shift/(MW/yr)]	Labor Cost [$/W]
	Ingot [person/shift/(kg/hr)] at 100% yield & uptime	0.312004	0.0711956	0.0190553	0.141423	0.032271	0.00863725	0.159832	0.0364718	0.00976156	0.0387145
	Wafer [person/shift/(wafer/hr)] at 100% yield & uptime	0.00318098	0.000651527	0.000191625	0.083	0.017	0.005	0.0938041	0.0192129	0.00565085	0.0221721
	Cell [person/shift/(wafer/hr)] at 100% yield & uptime	0.00252946	0.00130305	0.000191625	0.066	0.034	0.005	0.0708617	0.0365045	0.00536831	0.0223579
	Module [person/shift/(module/hr)] at 100% yield & uptime	0.142569	0.0781832	0.0110376	0.062	0.034	0.0048	0.0652357	0.0357744	0.00505051	0.0211358
											0.10438
	Input Electricity
	Reference Module Efficiency	13.6	[%]
	Ingot Solidification Need	25.4	[kWh/kg]
	Wafering Need at Ref Efficiency	0.2	[kWh/W]
	Cell Need at Ref Efficiency	0.34	[kWh/W]
	Module Need at Ref Efficiency	0.05	[kWh/W]
		At 100% yield [$/W]	Yield from Step	Cost [$/W]
	Ingot Solidification Electricity Cost	0.00751744	0.92169	0.00815614
	Wafer Electricity Cost	0.011679	0.92169	0.0126713
	Cell Electricity Cost	0.0198543	0.9702	0.0204641
	Module Electricity Cost	0.00291975	0.99	0.00294924
	Total Energy Cost			0.0442408
	Yield Loss
	Ingot Yield	1	[-]
	Wafering Yield	0.95	[-]
	Cell Process Yield	0.98	[-]
	Module Process Yield	0.99	[-]
	Total Yield	0.92169	[-]
	Crucible
	Ingot Mass	150	[kg]
	Crucible Cost	400	[$/ingot]
	Crucible Uses	5	[-]
	Crucibles Cost at 100% yield	0.00229762	[$/W]
	Yield from this step on	0.92169	[-]
	Crucible Cost	0.00249283	[$/W]
	Wire
	Wire Cost	0.5	[$/km]
	Wire Speed	15	[m/s]
	Table Speed	210	[?m/min]
	Load Length	1.73	[m]
	Kerf Loss per Wire	130	[?m]
	Length of wire around each wafer in Load [m]	0.78	[m]
	Time to Cut	12.381	[hr]
	Wire Used Refreshing Web Before Cut	4.3529	[km]
	Wire Consumed While Cutting	668.571	[km]
	Total Wire Used per Run	672.924	[km]
	Wire Cost per Run	336.462	[$]
	Wafers Per Run	5580.65	[wafers]
	Cost per Wafer at 100% yield	0.0602909	[$/wafer]
	Yield from this step on	0.92169	[-]
	Wire Cost per wafer	0.0654134	[$/wafer]
	Wire consumed per Wafer at 100% yield	120.582	[m/wafer]
	Wire consumed per Wafer	130.827	[m/wafer]
	Wire consumed per Wafer at 100% yield	4.95487	[km/m2 wafer]
	Wire consumed per Wafer	5.37586	[km/m2 wafer]
	Slurry
	Slurry Consumption	0.13	[kg/wafer]
	Slurry Cost	1.6	[$/kg]
	Slurry Recovery	75	[%]
	Cost per Wafer at 100% yield	0.052	[$/wafer]
	Yield from this step on	0.92169	[-]
	Slurry Cost per wafer	0.0564181	[$/wafer]
	Metal Paste
	Cost of Front Silver Paste	562	[$/kg]
	Front Silver Paste utilization	0.115	[g/cell]
	Cost of Front Silver Paste	0.06463	[$/cell]
	Cost of Rear Silver Paste	562	[$/kg]
	Rear Silver Paste utilization	0.085	[g/cell]
	Cost of Rear Silver Paste	0.04777	[$/cell]
	Cost of Al Paste	16.5	[$/kg]
	Al Paste utilization	1.4	[g/cell]
	Cost of Al Paste	0.0231	[$/cell]
	Cost of Metal Paste at 100% yield	0.1355	[$/cell]
	Yield from this step on	0.9702	[-]
	Cost of Metal Paste	0.139662	[$/cell]
	Screen Printing
	Screen Prints per cell	4	[prints/cell]
	Lifetime of Screen	8000	[prints]
	Cost of Screen	70	[$]
	Cost of Screen at 100% yield	0.035	[$/cell]
	Yield from this step on	0.9702	[-]
	Cost of Screen	0.036075	[$/cell]
	Module Materials
		Cost [$/m]	At 100% Yield Cost [$/W]	Yield from Step	Cost [$/W]
	Frame	1.2	0.0241428	0.99	0.0243867
		Cost [$/m^2]	At 100% Yield Cost [$/W]		Cost [$/W]
	Backsheet	4.75	0.0296875	0.99	0.0299874
	Encapsulant	1.8	0.0225	0.99	0.0227273
	Glass	5.6	0.035	0.99	0.0353535
		Cost [$/module]	At 100% Yield Cost [$/W]		Cost [$/W]
	JB, Cable, Potting agent, and sticker	7.5	0.0285714	0.99	0.02886
	Ribbon	6.15	0.0234285	0.99	0.0236652
	Shipping Costs
	Watts in container	156800	[W/container]
	Shipping Costs	0	[$/container]
	Shipping Cost	0	[$/W]
	Minimum Sustainable Price Calculations
	Minimum Sustainable Price
	Shipment	2000	[MW/yr]
	MSP in Year 0	0.851423	[$/W]
	IRR	0.14	[%]
	Total Capex	1.47548e+09	[$]
	Total NWC	3.14978e+08	[$]
	Ingot
	Ingot Equipment Investment	3.14115e+08	[$]
	Ingot Facility Investment	4.0137e+07	[$]
	Year	MSP [$/W]	Revenue [$]	Variable Cost [$/W]	Variable Cost [$]	Equipment MACRS Depreciation Factor	Equipment Depreciation [$]	Facility Depreciation Factor	Facility Depreciation [$]	Gross Profit [$]	Operating Expenses [$]	Operating Income [$]	Gain on Salvage [$]	NOL [$]	NOL Remaining [$]	NOL Used [$]	Tax [$]	NWC [$]	Change in NWC [$]	Capital Investment [$]	Salvage of Facility [$]	Salvage Book Value [$]	Incremental Cash Flow [$]
	0	0.236847	0	0.156903	0	0	0	0	0	0	0	0	0	0	0	0	0	9.08861e+07	9.08861e+07	-3.54252e+08	0	4.0137e+07	-4.45138e+08
	1	0.236847	4.73694e+08	0.156903	-3.13807e+08	0.1429	-4.48871e+07	0.01391	-558305	1.14442e+08	-4.97379e+07	6.47045e+07	0	0	0	0	-1.80525e+07	9.08861e+07	0		0	3.95787e+07	9.20973e+07
	2	0.236847	4.73694e+08	0.156903	-3.13807e+08	0.2449	-7.69268e+07	0.02564	-1.02911e+06	8.19318e+07	-4.97379e+07	3.21939e+07	0	0	0	0	-8.9821e+06	9.08861e+07	0		0	3.85495e+07	1.01168e+08
	3	0.236847	4.73694e+08	0.156903	-3.13807e+08	0.1749	-5.49388e+07	0.02564	-1.02911e+06	1.0392e+08	-4.97379e+07	5.4182e+07	0	0	0	0	-1.51168e+07	9.08861e+07	0		0	3.75204e+07	9.50331e+07
	4	0.236847	4.73694e+08	0.156903	-3.13807e+08	0.1249	-3.9233e+07	0.02564	-1.02911e+06	1.19626e+08	-4.97379e+07	6.98877e+07	0	0	0	0	-1.94987e+07	9.08861e+07	0		0	3.64913e+07	9.06512e+07
	5	0.236847	4.73694e+08	0.156903	-3.13807e+08	0.0893	-2.80505e+07	0.02564	-1.02911e+06	1.30808e+08	-4.97379e+07	8.10702e+07	0	0	0	0	-2.26186e+07	9.08861e+07	0		0	3.54622e+07	8.75312e+07
	6	0.236847	4.73694e+08	0.156903	-3.13807e+08	0.0892	-2.80191e+07	0.02564	-1.02911e+06	1.3084e+08	-4.97379e+07	8.11016e+07	0	0	0	0	-2.26274e+07	9.08861e+07	0		0	3.44331e+07	8.75225e+07
	7	0.236847	4.73694e+08	0.156903	-3.13807e+08	0.0893	-2.80505e+07	0.02564	-1.02911e+06	1.30808e+08	-4.97379e+07	8.10702e+07	-4.50537e+06	0	0	0	-2.13616e+07	0	-9.08861e+07		2.88986e+07	3.3404e+07	2.08573e+08
	8	0	0	0	0	0.0446	0	0.02564	0	0	0	0	0	0	0	0	0	0	0		0	0	0
	9	0	0	0	0	0	0	0.02564	0	0	0	0	0	0	0	0	0	0	0		0	0	0
	10	0	0	0	0	0	0	0.02564	0	0	0	0	0	0	0	0	0	0	0		0	0	0
	11	0	0	0	0	0	0	0.02564	0	0	0	0	0	0	0	0	0	0	0		0	0	0
	12	0	0	0	0	0	0	0.02564	0	0	0	0	0	0	0	0	0	0	0		0	0	0
	13	0	0	0	0	0	0	0.02564	0	0	0	0	0	0	0	0	0	0	0		0	0	0
	14	0	0	0	0	0	0	0.02564	0	0	0	0	0	0	0	0	0	0	0		0	0	0
	15	0	0	0	0	0	0	0.02564	0	0	0	0	0	0	0	0	0	0	0		0	0	0
	16	0	0	0	0	0	0	0.02564	0	0	0	0	0	0	0	0	0	0	0		0	0	0
	17	0	0	0	0	0	0	0.02564	0	0	0	0	0	0	0	0	0	0	0		0	0	0
	18	0	0	0	0	0	0	0.02564	0	0	0	0	0	0	0	0	0	0	0		0	0	0
	19	0	0	0	0	0	0	0.02564	0	0	0	0	0	0	0	0	0	0	0		0	0	0
	20	0	0	0	0	0	0	0.02564	0	0	0	0	0	0	0	0	0	0	0		0	0	0
																						NPV for Firm	0
																						IRR	0.14
	Wafer
	Wafer Equipment Investment	1.76884e+08	[$]
	Wafer Facility Investment	3.66434e+07	[$]
	Year	MSP [$/W]	Revenue [$]	Variable Cost [$/W]	Variable Cost [$]	Equipment MACRS Depreciation Factor	Equipment Depreciation [$]	Facility Depreciation Factor	Facility Depreciation [$]	Gross Profit [$]	Operating Expenses [$]	Operating Income [$]	Gain on Salvage [$]	NOL [$]	NOL Remaining [$]	NOL Used [$]	Tax [$]	NWC [$]	Change in NWC [$]	Capital Investment [$]	Salvage of Facility [$]	Salvage Book Value [$]	Incremental Cash Flow [$]
	0	0.110706	0	0.0676623	0	0	0	0	0	0	0	0	0	0	0	0	0	3.96432e+07	3.96432e+07	-2.13527e+08	0	3.66434e+07	-2.5317e+08
	1	0.110706	2.21412e+08	0.0676623	-1.35325e+08	0.1429	-2.52767e+07	0.01391	-509710	6.03006e+07	-2.32482e+07	3.70524e+07	0	0	0	0	-1.03376e+07	3.96432e+07	0		0	3.61337e+07	5.25011e+07
	2	0.110706	2.21412e+08	0.0676623	-1.35325e+08	0.2449	-4.33188e+07	0.02564	-939537	4.18286e+07	-2.32482e+07	1.85804e+07	0	0	0	0	-5.18394e+06	3.96432e+07	0		0	3.51942e+07	5.76548e+07
	3	0.110706	2.21412e+08	0.0676623	-1.35325e+08	0.1749	-3.09369e+07	0.02564	-939537	5.42105e+07	-2.32482e+07	3.09623e+07	0	0	0	0	-8.63847e+06	3.96432e+07	0		0	3.42546e+07	5.42003e+07
	4	0.110706	2.21412e+08	0.0676623	-1.35325e+08	0.1249	-2.20928e+07	0.02564	-939537	6.30547e+07	-2.32482e+07	3.98065e+07	0	0	0	0	-1.1106e+07	3.96432e+07	0		0	3.33151e+07	5.17327e+07
	5	0.110706	2.21412e+08	0.0676623	-1.35325e+08	0.0893	-1.57957e+07	0.02564	-939537	6.93517e+07	-2.32482e+07	4.61035e+07	0	0	0	0	-1.28629e+07	3.96432e+07	0		0	3.23756e+07	4.99759e+07
	6	0.110706	2.21412e+08	0.0676623	-1.35325e+08	0.0892	-1.5778e+07	0.02564	-939537	6.93694e+07	-2.32482e+07	4.61212e+07	0	0	0	0	-1.28678e+07	3.96432e+07	0		0	3.1436e+07	4.99709e+07
	7	0.110706	2.21412e+08	0.0676623	-1.35325e+08	0.0893	-1.57957e+07	0.02564	-939537	6.93517e+07	-2.32482e+07	4.61035e+07	-4.11322e+06	0	0	0	-1.17153e+07	0	-3.96432e+07		2.63833e+07	3.04965e+07	1.1715e+08
	8	0	0	0	0	0.0446	0	0.02564	0	0	0	0	0	0	0	0	0	0	0		0	0	0
	9	0	0	0	0	0	0	0.02564	0	0	0	0	0	0	0	0	0	0	0		0	0	0
	10	0	0	0	0	0	0	0.02564	0	0	0	0	0	0	0	0	0	0	0		0	0	0
	11	0	0	0	0	0	0	0.02564	0	0	0	0	0	0	0	0	0	0	0		0	0	0
	12	0	0	0	0	0	0	0.02564	0	0	0	0	0	0	0	0	0	0	0		0	0	0
	13	0	0	0	0	0	0	0.02564	0	0	0	0	0	0	0	0	0	0	0		0	0	0
	14	0	0	0	0	0	0	0.02564	0	0	0	0	0	0	0	0	0	0	0		0	0	0
	15	0	0	0	0	0	0	0.02564	0	0	0	0	0	0	0	0	0	0	0		0	0	0
	16	0	0	0	0	0	0	0.02564	0	0	0	0	0	0	0	0	0	0	0		0	0	0
	17	0	0	0	0	0	0	0.02564	0	0	0	0	0	0	0	0	0	0	0		0	0	0
	18	0	0	0	0	0	0	0.02564	0	0	0	0	0	0	0	0	0	0	0		0	0	0
	19	0	0	0	0	0	0	0.02564	0	0	0	0	0	0	0	0	0	0	0		0	0	0
	20	0	0	0	0	0	0	0.02564	0	0	0	0	0	0	0	0	0	0	0		0	0	0
																						NPV for Firm	0
																						IRR	0.14
	Cell
	Cell Equipment Investment	5.51993e+08	[$]
	Cell Facility Investment	9.10711e+07	[$]
	Year	MSP [$/W]	Revenue [$]	Variable Cost [$/W]	Variable Cost [$]	Equipment MACRS Depreciation Factor	Equipment Depreciation [$]	Facility Depreciation Factor	Facility Depreciation [$]	Gross Profit [$]	Operating Expenses [$]	Operating Income [$]	Gain on Salvage [$]	NOL [$]	NOL Remaining [$]	NOL Used [$]	Tax [$]	NWC [$]	Change in NWC [$]	Capital Investment [$]	Salvage of Facility [$]	Salvage Book Value [$]	Incremental Cash Flow [$]
	0	0.236426	0	0.121013	0	0	0	0	0	0	0	0	0	0	0	0	0	7.29191e+07	7.29191e+07	-6.43064e+08	0	9.10711e+07	-7.15983e+08
	1	0.236426	4.72852e+08	0.121013	-2.42027e+08	0.1429	-7.88797e+07	0.01391	-1.2668e+06	1.50679e+08	-4.96495e+07	1.01029e+08	0	0	0	0	-2.81872e+07	7.29191e+07	0		0	8.98043e+07	1.52989e+08
	2	0.236426	4.72852e+08	0.121013	-2.42027e+08	0.2449	-1.35183e+08	0.02564	-2.33506e+06	9.33072e+07	-4.96495e+07	4.36577e+07	0	0	0	0	-1.21805e+07	7.29191e+07	0		0	8.74692e+07	1.68995e+08
	3	0.236426	4.72852e+08	0.121013	-2.42027e+08	0.1749	-9.65435e+07	0.02564	-2.33506e+06	1.31947e+08	-4.96495e+07	8.22972e+07	0	0	0	0	-2.29609e+07	7.29191e+07	0		0	8.51341e+07	1.58215e+08
	4	0.236426	4.72852e+08	0.121013	-2.42027e+08	0.1249	-6.89439e+07	0.02564	-2.33506e+06	1.59546e+08	-4.96495e+07	1.09897e+08	0	0	0	0	-3.06612e+07	7.29191e+07	0		0	8.27991e+07	1.50515e+08
	5	0.236426	4.72852e+08	0.121013	-2.42027e+08	0.0893	-4.92929e+07	0.02564	-2.33506e+06	1.79197e+08	-4.96495e+07	1.29548e+08	0	0	0	0	-3.61438e+07	7.29191e+07	0		0	8.0464e+07	1.45032e+08
	6	0.236426	4.72852e+08	0.121013	-2.42027e+08	0.0892	-4.92377e+07	0.02564	-2.33506e+06	1.79252e+08	-4.96495e+07	1.29603e+08	0	0	0	0	-3.61592e+07	7.29191e+07	0		0	7.81289e+07	1.45017e+08
	7	0.236426	4.72852e+08	0.121013	-2.42027e+08	0.0893	-4.92929e+07	0.02564	-2.33506e+06	1.79197e+08	-4.96495e+07	1.29548e+08	-1.02227e+07	0	0	0	-3.32917e+07	0	-7.29191e+07		6.55712e+07	7.57939e+07	2.86374e+08
	8	0	0	0	0	0.0446	0	0.02564	0	0	0	0	0	0	0	0	0	0	0		0	0	0
	9	0	0	0	0	0	0	0.02564	0	0	0	0	0	0	0	0	0	0	0		0	0	0
	10	0	0	0	0	0	0	0.02564	0	0	0	0	0	0	0	0	0	0	0		0	0	0
	11	0	0	0	0	0	0	0.02564	0	0	0	0	0	0	0	0	0	0	0		0	0	0
	12	0	0	0	0	0	0	0.02564	0	0	0	0	0	0	0	0	0	0	0		0	0	0
	13	0	0	0	0	0	0	0.02564	0	0	0	0	0	0	0	0	0	0	0		0	0	0
	14	0	0	0	0	0	0	0.02564	0	0	0	0	0	0	0	0	0	0	0		0	0	0
	15	0	0	0	0	0	0	0.02564	0	0	0	0	0	0	0	0	0	0	0		0	0	0
	16	0	0	0	0	0	0	0.02564	0	0	0	0	0	0	0	0	0	0	0		0	0	0
	17	0	0	0	0	0	0	0.02564	0	0	0	0	0	0	0	0	0	0	0		0	0	0
	18	0	0	0	0	0	0	0.02564	0	0	0	0	0	0	0	0	0	0	0		0	0	0
	19	0	0	0	0	0	0	0.02564	0	0	0	0	0	0	0	0	0	0	0		0	0	0
	20	0	0	0	0	0	0	0.02564	0	0	0	0	0	0	0	0	0	0	0		0	0	0
																						NPV for Firm	0
																						IRR	0.14
	Module
	Module Equipment Investment	1.94376e+08	[$]
	Module Facility Investment	7.02593e+07	[$]
	Year	MSP [$/W]	Revenue [$]	Variable Cost [$/W]	Variable Cost [$]	Equipment MACRS Depreciation Factor	Equipment Depreciation [$]	Facility Depreciation Factor	Facility Depreciation [$]	Gross Profit [$]	Operating Expenses [$]	Operating Income [$]	Gain on Salvage [$]	NOL [$]	NOL Remaining [$]	NOL Used [$]	Tax [$]	NWC [$]	Change in NWC [$]	Capital Investment [$]	Salvage of Facility [$]	Salvage Book Value [$]	Incremental Cash Flow [$]
	0	0.267444	0	0.194978	0	0	0	0	0	0	0	0	0	0	0	0	0	1.1153e+08	1.1153e+08	-2.64636e+08	0	7.02593e+07	-3.76166e+08
	1	0.267444	5.34889e+08	0.194978	-3.89957e+08	0.1429	-2.77764e+07	0.01391	-977307	1.16178e+08	-5.61633e+07	6.00148e+07	0	0	0	0	-1.67441e+07	1.1153e+08	0		0	6.9282e+07	7.20244e+07
	2	0.267444	5.34889e+08	0.194978	-3.89957e+08	0.2449	-4.76028e+07	0.02564	-1.80145e+06	9.55276e+07	-5.61633e+07	3.93643e+07	0	0	0	0	-1.09826e+07	1.1153e+08	0		0	6.74805e+07	7.77859e+07
	3	0.267444	5.34889e+08	0.194978	-3.89957e+08	0.1749	-3.39964e+07	0.02564	-1.80145e+06	1.09134e+08	-5.61633e+07	5.29706e+07	0	0	0	0	-1.47788e+07	1.1153e+08	0		0	6.56791e+07	7.39897e+07
	4	0.267444	5.34889e+08	0.194978	-3.89957e+08	0.1249	-2.42776e+07	0.02564	-1.80145e+06	1.18853e+08	-5.61633e+07	6.26894e+07	0	0	0	0	-1.74904e+07	1.1153e+08	0		0	6.38776e+07	7.12781e+07
	5	0.267444	5.34889e+08	0.194978	-3.89957e+08	0.0893	-1.73578e+07	0.02564	-1.80145e+06	1.25773e+08	-5.61633e+07	6.96092e+07	0	0	0	0	-1.9421e+07	1.1153e+08	0		0	6.20762e+07	6.93475e+07
	6	0.267444	5.34889e+08	0.194978	-3.89957e+08	0.0892	-1.73384e+07	0.02564	-1.80145e+06	1.25792e+08	-5.61633e+07	6.96287e+07	0	0	0	0	-1.94264e+07	1.1153e+08	0		0	6.02747e+07	6.93421e+07
	7	0.267444	5.34889e+08	0.194978	-3.89957e+08	0.0893	-1.73578e+07	0.02564	-1.80145e+06	1.25773e+08	-5.61633e+07	6.96092e+07	-7.8866e+06	0	0	0	-1.72206e+07	0	-1.1153e+08		5.05867e+07	5.84733e+07	2.33665e+08
	8	0	0	0	0	0.0446	0	0.02564	0	0	0	0	0	0	0	0	0	0	0		0	0	0
	9	0	0	0	0	0	0	0.02564	0	0	0	0	0	0	0	0	0	0	0		0	0	0
	10	0	0	0	0	0	0	0.02564	0	0	0	0	0	0	0	0	0	0	0		0	0	0
	11	0	0	0	0	0	0	0.02564	0	0	0	0	0	0	0	0	0	0	0		0	0	0
	12	0	0	0	0	0	0	0.02564	0	0	0	0	0	0	0	0	0	0	0		0	0	0
	13	0	0	0	0	0	0	0.02564	0	0	0	0	0	0	0	0	0	0	0		0	0	0
	14	0	0	0	0	0	0	0.02564	0	0	0	0	0	0	0	0	0	0	0		0	0	0
	15	0	0	0	0	0	0	0.02564	0	0	0	0	0	0	0	0	0	0	0		0	0	0
	16	0	0	0	0	0	0	0.02564	0	0	0	0	0	0	0	0	0	0	0		0	0	0
	17	0	0	0	0	0	0	0.02564	0	0	0	0	0	0	0	0	0	0	0		0	0	0
	18	0	0	0	0	0	0	0.02564	0	0	0	0	0	0	0	0	0	0	0		0	0	0
	19	0	0	0	0	0	0	0.02564	0	0	0	0	0	0	0	0	0	0	0		0	0	0
	20	0	0	0	0	0	0	0.02564	0	0	0	0	0	0	0	0	0	0	0		0	0	0
																						NPV for Firm	0
																						IRR	0.14

## Sheet: Notes
Notes by Tonio Buonassisi: • To use this spreadsheet, alter one of the boxes in "Top-Level Inputs." Then, open the Solver and click "Solve." • NB: You may first need to "add" Excel Solver before you can use it; instructions for Mac https://support.microsoft.com/en-us/kb/2431349 and PC https://support.office.com/en-us/article/load-the-solver-add-in-612926fc-d53b-46b4-872c-e24772f078ca • The Solver…
