# Supplementary material for: The capital intensity of photovoltaics manufacturing: barrier to scale and opportunity for innovation
Source: Royal Society of Chemistry journal article supplement (doi:10.1039/c5ee01509j), 2015-01-01
Supplement: c5ee01509j2.xlsx [file c5ee01509j2.xlsx]

## Sheet: By Process Step 2014-2H
2014-2H Capex Estimate for Standard mono Si with U.S. Manufacturing
Supporting Online Materials from: Douglas M. Powell, Ran Fu, Kelsey Horowitz, Paul A. Basore, Michael Woodhouse, and Tonio Buonassisi, "The Capital Intensity of Photovoltaics Manufacturing: Barrier to Scale and Opportunity for Innovation" (2015)
MIT Photovoltaic Research Laboratory — http://pv.mit.edu
		Step	Equipment + Facility	Equipment	Facility
Poly	TCS Production from mg-Si	TCS Production	0.121144	0.0484577	0.0726866
	Pull Filament Ingot	Pull Filament	0.00412992	0.00165197	0.00247795
	Anneal, Crop, and Saw Filaments from Ingot	Anneal & Saw Filament	0.00148677	0.000594708	0.000892063
	Machine and Etch Filaments for Siemens Reactor	Machine & Etch Filament	0.00473564	0.00189426	0.00284138
	Siemens CVD	Siemens CVD	0.178853	0.0715412	0.107312
	Harvest and Package Chunk	Harvest Chunk, Package	0.0242289	0.00969155	0.0145373
Wafer	Czochralski Boule Formation	Czochralski Growth	0.156725	0.138968	0.017757
	Cropping, Squaring, Polishing, and Gluing to Glass	Brick Preparation	0.0275328	0.0237676	0.00376517
	Wire Sawing and Seperation of Wafers	Wire Sawing	0.0254149	0.0193296	0.00608526
	Slurry Collection and Reconditioning of Scrap	Slurry & Scrap Collection	0.0296507	0.028743	0.000907675
	Boule and Wafer Inspection and Sorting	Inspect and Sort, Package	0.0116485	0.00630164	0.00534685
Cell	Receiving Department and Wafer Testing	Wafer Testing	0.0169433	0.00871368	0.00822958
	Wet Chemical Surface Texture and Saw Damage Removal	Texture & Damage Etch	0.0347337	0.0314481	0.00328562
	POCl3 Diffusion	Emitter Diffusion	0.0540066	0.0494212	0.00458547
	PSG Removal and Edge Isolation	PSG Removal & Edge Isolate	0.0328276	0.0308677	0.00195985
	PECVD of SiNx:H AR Coating	PECVD of SiNx:H	0.0349455	0.0319502	0.00299533
	Screen Print	Screen Print	0.0561246	0.0514475	0.00467705
	Co-fire	Co-fire	0.0338865	0.0307097	0.00317686
	Inspection, I-V testing, package	Inspect, Sort, Package	0.0360044	0.0225028	0.0135017
Module	Receiving Department and Incoming Cell Testing	Cell Testing	0.028	0.0186667	0.00933333
	Cell Stringing, Tabbing, and Interconnections	String, Tab, and Interconnect	0.021	0.0177188	0.00328125
	Front Glass Unloading and Washing	Front Glass Load & Wash	0.009	0.00728571	0.00171429
	Front and Back Cell Encapsulation and Lamination to Frontside Glass	Encapsulate & Laminate	0.026	0.0206818	0.00531818
	Aluminum Frame and Silicone Sealant	Frame and Seal	0.013	0.0100455	0.00295455
	J-Box and Potting Agent	J-Box and Potting	0.0067	0.00574286	0.000957143
	Light Soak, Groud Continutiy, Hi-Pot, I-V Test, Storting, Labeling, and Packaging	Test, Sort, Package	0.022	0.0122222	0.00977778
	Sums
	Poly	0.334579
	Wafer	0.250972
	Cell	0.299472
	Module	0.1257
	Total	1.01072

## Sheet: By Process 2015-1H
2015-1H Capex Estimate for Standard mono Si with U.S. Manufacturing
Supporting Online Materials from: Douglas M. Powell, Ran Fu, Kelsey Horowitz, Paul A. Basore, Michael Woodhouse, and Tonio Buonassisi, "The Capital Intensity of Photovoltaics Manufacturing: Barrier to Scale and Opportunity for Innovation" (2015)
MIT Photovoltaic Research Laboratory — http://pv.mit.edu
		Step	Equipment + Facility
Poly	TCS Production from mg-Si	TCS Production	0.115638
	Pull Filament Ingot	Pull Filament	0.00412992
	Anneal, Crop, and Saw Filaments from Ingot	Anneal & Saw Filament	0.00148677
	Machine and Etch Filaments for Siemens Reactor	Machine & Etch Filament	0.00088105
	Siemens CVD	Siemens CVD	0.178853
	Harvest and Package Chunk	Harvest Chunk, Package	0.0242289
Wafer	Czochralski Boule Formation	Czochralski Growth	0.163608
	Cropping, Squaring, Polishing, and Gluing to Glass	Brick Preparation	0.0545361
	Wire Sawing and Seperation of Wafers	Wire Sawing	0.0540066
	Slurry Collection and Reconditioning of Scrap	Slurry & Scrap Collection	0.0296507
	Boule and Wafer Cleaning, Inspection, and Sorting	Inspect and Sort, Package	0.0349455
Cell	Receiving Department and Wafer Testing	Wafer Testing	0.067773
	Wet Chemical Surface Texture and Saw Damage Removal	Texture & Damage Etch	0.0203319
	POCl3 Diffusion	Emitter Diffusion	0.0381223
	PSG Removal and Edge Isolation	PSG Removal & Edge Isolate	0.022238
	PECVD of SiNx:H AR Coating	PECVD of SiNx:H	0.0328276
	Screen Print	Screen Print	0.0296507
	Co-fire	Co-fire	0.0275328
	Inspection, I-V testing, package	Inspect, Sort, Package	0.0137664
Module	Receiving Department and Incoming Cell Testing	Cell Testing	0.01
	Cell Stringing, Tabbing, and Interconnections	String, Tab, and Interconnect	0.018
	Front Glass Unloading and Washing	Front Glass Load & Wash	0.003
	Front and Back Cell Encapsulation and Lamination to Frontside Glass	Encapsulate & Laminate	0.016
	Aluminum Frame and Silicone Sealant	Frame and Seal	0.007
	J-Box and Potting Agent	J-Box and Potting	0.007
	Light Soak, Groud Continutiy, Hi-Pot, EL Test, Storting, Labeling, and Packaging	Test, Sort, Package	0.014
	Sums
	Poly	0.325217
	Wafer	0.336747
	Cell	0.252243
	Module	0.075
	Total	0.989208
