# Supplementary material for: The capital intensity of photovoltaics manufacturing: barrier to scale and opportunity for innovation
Source: Royal Society of Chemistry journal article supplement (doi:10.1039/c5ee01509j), 2015-01-01
Supplement: c5ee01509j3.xlsx [file c5ee01509j3.xlsx]

## Sheet: Sheet1
Sustainable Growth Rate Calculator
Supporting Online Materials from: Douglas M. Powell, Ran Fu, Kelsey Horowitz, Paul A. Basore, Michael Woodhouse, and Tonio Buonassisi, "The Capital Intensity of Photovoltaics Manufacturing: Barrier to Scale and Opportunity for Innovation" (2015)
MIT Photovoltaic Research Laboratory — http://pv.mit.edu
	Inputs
	Operating Margin [%]	10.242
	PE&E0 Ratio [Upfront Capext-1/ Revenue]	0.468196
	Depreciation Period [yr]	7
	Working Capital [month]	3
	Tax Rate [%]	27.9
	Equity Portion of Capital	0.5
	Additional Debt available [1-yes,0-no]	1
	Debt Interest Rate [%]	0.046
	Pro Forma Balance Sheet
	Total capital needed in year 0 [$]
	WC [$]	20767.4
	Capex [$]	46819.6
	Sum [$]	67587
		End of Year 0	End of Year 1
	Equity [$]	33793.5	40057.2
	Debt [$]	33793.5	40057.2
	Total Capital [$]	67587	80114.4
	Pro Forma Income Statement
			During Year 1	During Year 2
	Revenue [$]		100000	118535
	COGS+OPEX [$]		83069.4	98466.6
	Depreciation [$]		6688.52	7928.25
	Operating Income (EBIT) [$]		10242	12140.4
	Interest Expense [$]		1554.5	1842.63
	Earnings before Taxes [$]		8687.54	10297.8
	Taxes [$]		2423.82	2873.09
	Net Income [$]		6263.72	7424.71
	Sustainable Growth Rate
	Constant Debt to Equity
	P, profit margin	0.0626372
	R, retention Ratio	1
	A, Asset Turnover	1.47957
	T, Leverage Factor for Additional Growth	2
	Sustainable Growth Rate (RPAT') [%]	18.5353
